# Supplementary material for: Evaluation of Physicochemical Properties of Ipsapirone Derivatives Based on Chromatographic and Chemometric Approaches
Source: MDPI journal article supplement (doi:10.3390/molecules29081862), 2024-04-19
Supplement: s1 [file s1]

Supplementary materials

# Evaluation of Physicochemical Properties of Ipsapirone Derivatives Based on Chromatographic and Chemometric Approaches

Wiktor Nisterenko <sup>1</sup>, Damian Kułaga <sup>2</sup>, Mateusz Wozniński <sup>1</sup>, Yash Raj Singh <sup>3</sup>, Beata Judzińska <sup>4,5</sup>, Karolina Jagiello <sup>4,5</sup>, Katarzyna Ewa Greber <sup>1</sup>, Wiesław Sawicki <sup>1</sup> and Krzesimir Ciura <sup>5,\*</sup>

<sup>1</sup> Department of Physical Chemistry, Faculty of Pharmacy, Medical University of Gdańsk, Aleja Generała Józefa Hallera 107, 80-416 Gdańsk, Poland; wnisterenko@gmail.com (W.N.); mateusz.wozinski@gumed.edu.pl (M.W.); katarzyna.greber@gumed.edu.pl (K.E.G.); w.sawicki@gumed.edu.pl (W.S.)

<sup>2</sup> Department of Organic Chemistry and Technology, Faculty of Chemical Engineering and Technology, Cracow University of Technology, 24 Warszawska Street, 31-155 Cracow, Poland; damian.kulaga@pk.edu.pl

<sup>3</sup> Department of Pharmaceutical Quality Assurance, LJ Institute of Pharmacy, LJ University, Ahmedabad 382210, India; yashraj.0804@gmail.com

<sup>4</sup> QSAR Lab, Trzy Lipy 3, 80-172 Gdańsk, Poland; b.judzinska@qsarlab.com (B.J.); k.jagiello@qsarlab.com (K.J.)

<sup>5</sup> Laboratory of Environmental Chemoinformatics, Faculty of Chemistry, University of Gdansk, Wita Stwosza 63, 80-308 Gdansk, Poland

\* Correspondence: krzesimir.ciura@gumed.edu.pl

**Table S1.** Summary of QSRR model of HSA based on the theoretical descriptors.

| QSRR equation                                                                                                                                      |                |                    |                               |                               |                         |                    |
|----------------------------------------------------------------------------------------------------------------------------------------------------|----------------|--------------------|-------------------------------|-------------------------------|-------------------------|--------------------|
| $\log K_{\text{HSA}} = 0.230(\pm 0.335) \text{ F05[C-N]} + 0.060(\pm 0.330) \text{ RDF155u} + 5.899(\pm 0.821) \text{ LLS\_01} + 1.955(\pm 1.240)$ |                |                    |                               |                               |                         |                    |
| Eq.                                                                                                                                                | R <sup>2</sup> | RMSE <sub>tr</sub> | Q <sup>2</sup> <sub>LLO</sub> | R <sup>2</sup> <sub>EXT</sub> | RMSE <sub>Ex</sub><br>t | CCC <sub>Ext</sub> |
| 1                                                                                                                                                  | 0.786          | 0.274              | 0.670                         | 0.7093                        | 0.302                   | 0.7954             |

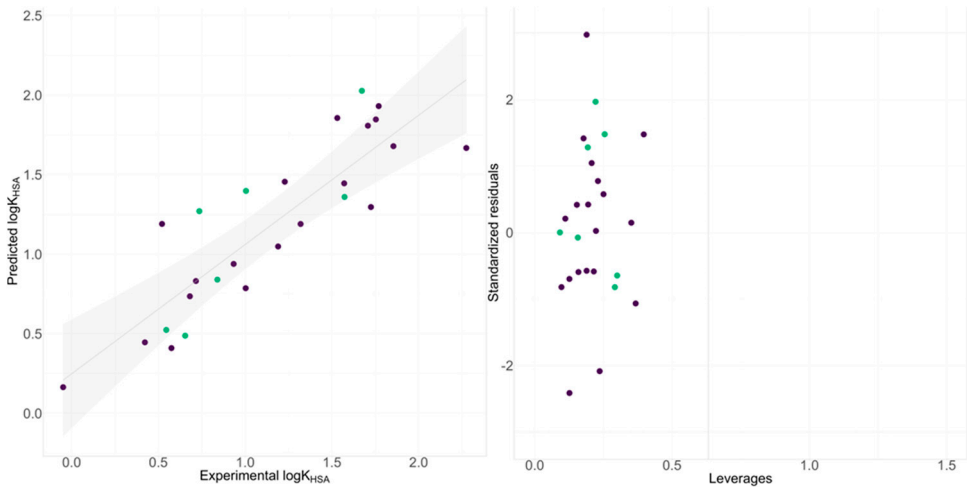

**Table S2.** List and SMILE notation of target structures.

| No | Smiles                                                                          | linker | R                     |
|----|---------------------------------------------------------------------------------|--------|-----------------------|
| 1  | <chem>O=C1N(CCCN2CCN(C3=CC=CC=C3)CC2)S(C4=CC=CC=C41)(=O)=O</chem>               | butyl  | H                     |
| 2  | <chem>O=C1N(CCCN2CCN(C3=CC=CC=C3OC)CC2)S(C4=CC=CC=C41)(=O)=O</chem>             | butyl  | 2-OMe-Ph              |
| 3  | <chem>O=C1N(CCCN2CCN(C3=CC=CC(Cl)=C3Cl)CC2)S(C4=CC=CC=C41)(=O)=O</chem>         | butyl  | 2,3-diCl-Ph           |
| 4  | <chem>O=C1N(CCCN2CCN(C3=CC=C(Cl)C=C3)CC2)S(C4=CC=CC=C41)(=O)=O</chem>           | butyl  | 4-Cl-Ph               |
| 5  | <chem>O=C1N(CCCCN2CCN(C3=CC=CC=C3)CC2)S(C4=CC=CC=C41)(=O)=O</chem>              | pentyl | H                     |
| 6  | <chem>O=C1N(CCCCN2CCN(C3=CC=CC=C3OC)CC2)S(C4=CC=CC=C41)(=O)=O</chem>            | pentyl | 2-OMe-Ph              |
| 7  | <chem>O=C1N(CCCCN2CCN(C3=CC=CC(Cl)=C3Cl)CC2)S(C4=CC=CC=C41)(=O)=O</chem>        | pentyl | 2,3-diCl-Ph           |
| 8  | <chem>O=C1N(CCCCN2CCN(C3=CC=C(Cl)C=C3)CC2)S(C4=CC=CC=C41)(=O)=O</chem>          | pentyl | 4-Cl-Ph               |
| 9  | <chem>O=C1N(CCCCN2CCN(C3=NC=CC=N3)CC2)S(C4=CC=CC=C41)(=O)=O</chem>              | pentyl | 2-pyrimidyl           |
| 10 | <chem>O=C1N(CCCCN2CCN(C3=CC=CC=N3)CC2)S(C4=CC=CC=C41)(=O)=O</chem>              | pentyl | 2-pyridyl             |
| 11 | <chem>O=C1N(CCCCN2CCN(C3=C(C=CC=C4)C4=CC=C3)CC2)S(C5=CC=CC=C51)(=O)=O</chem>    | pentyl | 1-naphthyl            |
| 12 | <chem>O=C1N(CCCCN2CCN(C3=CC=CC=C3)CC2)S(C4=CC=CC=C41)(=O)=O</chem>              | heksyl | H                     |
| 13 | <chem>O=C1N(CCCCN2CCN(C3=CC=CC=C3OC)CC2)S(C4=CC=CC=C41)(=O)=O</chem>            | heksyl | 2-OMe-Ph              |
| 14 | <chem>O=C1N(CCCCN2CCN(C3=CC(OC)=CC=C3)CC2)S(C4=CC=CC=C41)(=O)=O</chem>          | heksyl | 3-OMe-Ph              |
| 15 | <chem>O=C1N(CCCCN2CCN(C3=CC=C(OC)C=C3)CC2)S(C4=CC=CC=C41)(=O)=O</chem>          | heksyl | 4-OMe-Ph              |
| 16 | <chem>O=C1N(CCCCN2CCN(C3=CC=CC(Cl)=C3)CC2)S(C4=CC=CC=C41)(=O)=O</chem>          | heksyl | 3-Cl-Ph               |
| 17 | <chem>O=C1N(CCCCN2CCN(C3=CC=C(Cl)C=C3)CC2)S(C4=CC=CC=C41)(=O)=O</chem>          | heksyl | 4-Cl-Ph               |
| 18 | <chem>O=C1N(CCCCN2CCN(C3=CC=C(Cl)C(Cl)=C3)CC2)S(C4=CC=CC=C41)(=O)=O</chem>      | heksyl | 3,4-diCl-Ph           |
| 19 | <chem>O=C1N(CCCCN2CCN(C3=CC=CC(C(F)(F)F)=C3)CC2)S(C4=CC=CC=C41)(=O)=O</chem>    | heksyl | 3-CF <sub>3</sub> -Ph |
| 20 | <chem>O=C1N(CCCCN2CCN(C3=CC=CC=C3F)CC2)S(C4=CC=CC=C41)(=O)=O</chem>             | heksyl | 2-F-Ph                |
| 21 | <chem>O=C1N(CCCCN2CCN(C3=C(C=CC=C4)C4=CC=C3)CC2)S(C5=CC=CC=C51)(=O)=O</chem>    | heksyl | 1-naphthyl            |
| 22 | <chem>O=C1N(CCCCN2CCN(C3=CC=CC=N3)CC2)S(C4=CC=CC=C41)(=O)=O</chem>              | heksyl | 1-pyridyl             |
| 23 | <chem>O=C1N(CCCCN2CCN(C3=NC=CC=N3)CC2)S(C4=CC=CC=C41)(=O)=O</chem>              | heksyl | 1-pyrimidynyl         |
| 24 | <chem>O=C1N(CCCCN2CCN(C3=NSC4=C3C=CC=C4)CC2)S(C5=CC=CC=C51)(=O)=O</chem>        | heksyl | 3-benzisothiazole     |
| 25 | <chem>O=C1N(CCCCN2CCN(C3=CC=CC4=C3C=C54)CC2)S(C5=CC=CC=C51)(=O)=O</chem>        | heksyl | 1-benzothiophen       |
| 26 | <chem>O=C1N(CC2=CC=C(CN3CCN(C4=CC=CC=C4OC)CC3)C=C2)S(C5=CC=CC=C51)(=O)=O</chem> | xylene | H                     |

General structure of investigated molecules

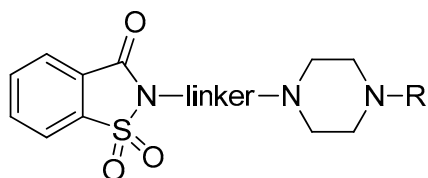

**Table S3.** Calibration mixtures for biomimetic chromatography.

| Compound                   | $t_{\text{mean}}$ | SD    | CHI <sub>C18</sub> |
|----------------------------|-------------------|-------|--------------------|
| <b>C<sub>18</sub>-HPLC</b> |                   |       |                    |
| Theophylline               | 2.19              | 0.024 | 18.4               |
| Benzimidazole              | 2.60              | 0.009 | 34.3               |
| Colichicine                | 3.27              | 0.006 | 42.0               |
| Acetophenone               | 3.58              | 0.007 | 65.1               |
| Indole                     | 3.99              | 0.005 | 71.5               |
| Propiophenone              | 4.13              | 0.005 | 77.5               |
| Butyrophenone              | 4.54              | 0.006 | 87.5               |
| Valerophenone              | 4.91              | 0.006 | 96.2               |
| <b>IAM-HPLC</b>            |                   |       |                    |
| Paracetamol                | 2.27              | 0.075 | 2.9                |
| Acetanilidine              | 2.84              | 0.047 | 11.5               |
| Acetophenone               | 3.16              | 0.038 | 17.2               |
| Propiohenone               | 3.79              | 0.023 | 25.9               |
| Butyrophenone              | 4.26              | 0.015 | 32.0               |
| Valerophenone              | 4.65              | 0.011 | 37.3               |
| Hexanophenone              | 4.98              | 0.010 | 41.8               |
| Heptanophenone             | 5.25              | 0.010 | 45.7               |
| Octanophenone              | 5.49              | 0.010 | 49.4               |
| <b>HSA-HPLC</b>            |                   |       |                    |
| Nizatidine                 | 2.10              | 0.027 | 35.0%              |
| Carbamazepine              | 5.31              | 0.069 | 75.0%              |
| Nicardipine                | 11.09             | 0.216 | 95.0%              |
| Indometacine               | 20.80             | 0.010 | 99.0%              |
| Diclofenac                 | 33.67             | 0.256 | 99.8%              |
